# Supplementary material
Source: publisher site journal article supplement (https://www.dovepress.com/article/364553)
Supplement: Supplementary file 1 [file get_supplementary_file.php]

**
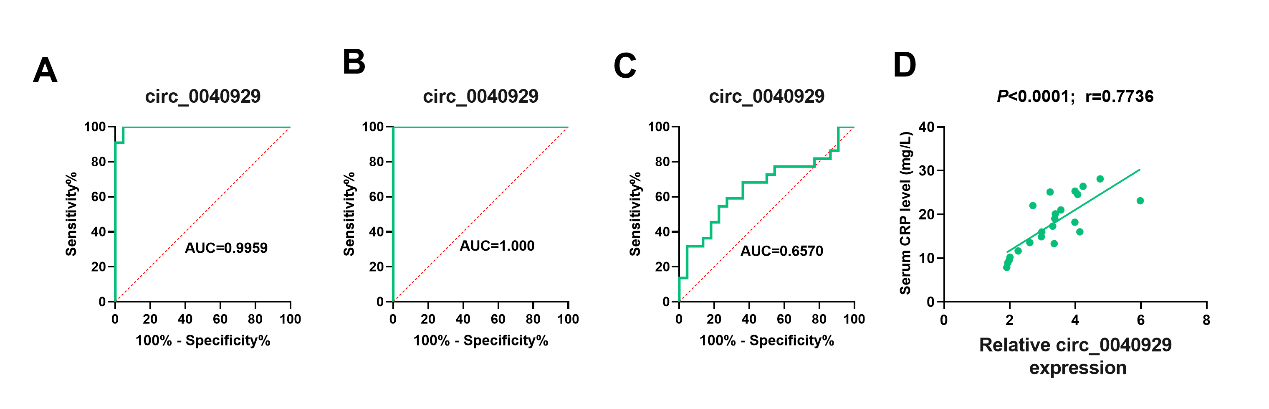
Supplementary Figure 1. ROC curve and correlation analysis.** ROC curve for circ_0040929 in distinguishing smokers from non-smokers (A), COPD from non-smokers (B), and COPD from smokers (C). (D) Pearson correlation analysis analyzed the correlation between circ_0040929 expression and CRP level in COPD patients.
